1  
2  
3  
4  
5  
6  
7  
8  
9  
10  
11  
12  
13  
14  
15  
16  
17  
18  
19  
20  
21  
22

**Chemical Stabilization of the HIV-1 Capsid Results in Efficient HIV-1 Reverse  
Transcription *in vitro***

Jordan Jennings,\* Jiong Shi,\* Janani Varadarajan, Parker J. Jamieson, and  
Christopher Aiken

Vanderbilt University Medical Center, Department of Pathology, Microbiology and  
Immunology, Nashville, TN 37235, USA

\*These authors contributed equally

Address correspondence to Christopher Aiken: [chris.aiken@vumc.org](mailto:chris.aiken@vumc.org)

**Running Title: Capsid-dependent HIV-1 reverse transcription *in vitro***

**Keywords:** HIV-1, reverse transcription, capsid, uncoating, inositol hexakisphosphate

23 **ABSTRACT**

24 A defining activity of retroviruses is reverse transcription, the process during which the  
25 viral genomic RNA is converted into the double strand DNA required for virus  
26 replication. Reverse transcriptase (RT), the viral enzyme responsible for this process,  
27 was identified in 1970 by assaying permeabilized retrovirus particles for DNA synthesis  
28 *in vitro*. Such reactions are inefficient with only a small fraction of viral genomes being  
29 converted to full-length double strand DNA molecules, possibly owing to disruption of  
30 the structure of the viral core. Here we show that reverse transcription in purified HIV-1  
31 cores is enhanced by the addition of the capsid-binding host cell metabolite inositol  
32 hexakisphosphate (IP6). IP6 potently enhanced full-length minus strand synthesis, as  
33 did hexacarboxybenzene (HCB) which also stabilizes the HIV-1 capsid. Both IP6 and  
34 HCB stabilized the association of the viral CA and RT proteins with HIV-1 cores. In  
35 contrast to the wild type, cores isolated from mutant HIV-1 particles containing  
36 intrinsically hyperstable capsids exhibited efficient reverse transcription in the absence  
37 of IP6, further indicating that the compound promotes reverse transcription by stabilizing  
38 the viral capsid. Our results show that stabilization of the HIV-1 capsid permits efficient  
39 reverse transcription in HIV-1 cores, providing a sensitive experimental system for  
40 analyzing the functions of viral and host cell molecules and the role of capsid  
41 disassembly (uncoating) in the process.

42

43 **IMPORTANCE** HIV-1 infection requires reverse transcription of the viral genome.

44 While much is known about the biochemistry of reverse transcription from simplified  
45 biochemical reactions, reverse transcription during infection takes place within a viral

46 core. However, endogenous reverse transcription reactions using permeabilized virions  
47 or purified viral cores have been inefficient. Using viral cores purified from infectious  
48 HIV-1 particles, we show that efficient reverse transcription is achieved *in vitro* by  
49 addition of the capsid-stabilizing metabolite inositol hexakisphosphate. Enhancement of  
50 reverse transcription was linked to the capsid-stabilizing effect of the compound,  
51 consistent with the known requirement for an intact or semi-intact viral capsid for HIV-1  
52 infection. Our results establish a biologically relevant system for dissecting the function  
53 of the viral capsid and its disassembly during reverse transcription. The system may  
54 also prove useful for mechanistic studies of emerging capsid-targeting antiviral drugs.  
55

## 56 INTRODUCTION

57

58 During retrovirus infection, the viral membrane fuses with the target cell, releasing the  
59 viral core into the cytoplasm. The core, consisting of a capsid shell surrounding the viral  
60 genome and its associated proteins, represents the functional viral payload. In the cell,  
61 the viral RNA genome is converted into a double strand DNA molecule by reverse  
62 transcription, producing the cis-acting viral sequences necessary for integration and  
63 subsequent gene expression. Reverse transcription is catalyzed by the viral reverse  
64 transcriptase enzyme (RT) and takes place in a ribonucleoprotein complex housed  
65 within the viral capsid. For HIV-1, pharmacological or genetic perturbations of the  
66 stability of the capsid typically result in impaired infectivity. Specifically, destabilization  
67 of the viral capsid leads to inefficient reverse transcription in target cells (1, 2) while  
68 hyperstabilization of the capsid inhibits nuclear entry and integration (3, 4). Similarly,  
69 premature capsid disruption in cells expressing restrictive TRIM5 proteins is associated  
70 with impaired reverse transcription (5, 6). Collectively, these studies have established  
71 that the integrity of the viral capsid is important for efficient HIV-1 reverse transcription  
72 in target cells.

73

74 HIV-1 reverse transcription occurs in a series of stages (reviewed in (7)).

75 Synthesis of the minus strand is primed near the 5' end of the genome by a tRNA,  
76 resulting in run-off synthesis of a short DNA molecule, the minus strand strong stop.  
77 Subsequently, this product anneals to the 3' end of the genome and is extended,  
78 resulting in a ~9 kb minus strand product. Plus-strand synthesis is primed by a small

79 RNA remnant at the beginning of the U3 sequence, resulting in a short product that is  
80 then extended after annealing to the 3' end of the minus strand. Subsequently,  
81 synthesis of the two viral long terminal repeat sequences (LTRs) is completed, resulting  
82 in a preintegration complex (PIC) that catalyzes integration of the nascent viral DNA into  
83 the target cell genome. A recent study suggests that nuclear entry precedes the  
84 completion of reverse transcription, suggesting that the core/reverse transcription  
85 complex responds to a specific nuclear signal or is activated during the process of  
86 nuclear entry (8). Nonetheless, it is known that active PICs containing two complete  
87 DNA ends can be recovered from the cytoplasm of acutely infected cells (9).

88  
89 Inositol phosphates are abundant cellular metabolites that participate in a wide  
90 array of cell activities (reviewed in (10)). These highly charged small molecules include  
91 inositol (1,3,4,5,6) pentakisphosphate (IP5) and inositol hexakisphosphate (IP6). IP6  
92 binds to numerous host cell proteins and regulates diverse biological processes,  
93 including chromatin remodeling (11), mRNA nuclear export (12, 13), platelet  
94 aggregation (14), prion propagation (15), and circadian rhythm (16). IP6 binds to the  
95 HIV-1 capsid *in vitro* and stabilizes the hexameric CA lattice. It associates with the  
96 center of the CA hexamer, forming ionic interactions with the six Arg18 side chains  
97 residing within the hexamer pore formed by the CA N-terminal domains (17, 18). In  
98 endogenous reverse transcription reactions with purified HIV-1 cores, the addition of IP6  
99 protected the newly synthesized viral DNA from degradation by exogenously added  
100 DNaseI *in vitro*, suggesting that the viral capsid can provide an barrier to access of the  
101 viral genome (18). IP6 is incorporated into budding HIV-1 particles via an interaction

102 with a distinct site in the assembling Gag lattice, near the CA-SP1 junction (17). It has  
103 been proposed that during maturation, IP6 is released upon proteolytic cleavage of Gag  
104 and subsequently associates with the mature capsid lattice and stabilizes it (17, 18).  
105 The critical importance of capsid stability in HIV-1 reverse transcription and infection,  
106 coupled with the relative biochemical instability of purified HIV-1 cores, makes this an  
107 appealing model. However, a role of IP6 in reverse transcription itself has not been  
108 established.

109

110         Although HIV-1 reverse transcription occurs efficiently in permissive target cells,  
111 *in vitro* assays of reverse transcription in permeabilized virions are typically inefficient,  
112 for unclear reasons. In these “endogenous reverse transcription” reactions, only a small  
113 fraction of viral genomes is converted into full-length double-strand DNA molecules.  
114 Such reactions have frequently relied on the addition of detergents or other membrane-  
115 disrupting agents to suspensions of concentrated virions, thus permitting access of  
116 dNTPs to the viral core (19, 20). The addition of detergents may compromise reverse  
117 transcription reactions by destabilizing the viral capsid, resulting in dissociation of RT  
118 from the template and its diffusion out of the viral core (21). HIV-1 reverse transcription  
119 complexes (RTCs) isolated from acutely infected cells generally lack substantial  
120 quantities of the CA protein (22), suggesting that the capsid dissociates during cell  
121 permeabilization. The apparent fragility of HIV-1 cores and reverse transcription  
122 complexes has hampered biochemical studies of early events in HIV-1 infection,  
123 specifically reverse transcription and the role of the viral capsid in this process.

124

125 To address this problem, we identified detergent-free experimental conditions in  
126 which HIV-1 cores purified from infectious virions undergo efficient reverse transcription.  
127 We show here that addition of the capsid-stabilizing cell metabolite IP6 markedly  
128 enhances the efficiency of reverse transcription by promoting the synthesis of full-length  
129 minus strand DNA. IP6 also stabilized the association of the CA and RT proteins with  
130 HIV-1 cores, suggesting that the effect was mediated by capsid stabilization. Our results  
131 are consistent with a model in which the viral capsid promotes retention of a sufficient  
132 concentration of RT in association with the viral genome to ensure completion of  
133 reverse transcription.

134

## 135 **RESULTS**

136 **Establishment of the endogenous reverse transcription (ERT) reaction**  
137 **using purified HIV-1 cores.** In an effort to improve the efficiency of ERT, we incubated  
138 samples of purified HIV-1 cores with dNTPs *in vitro* and analyzed the products by  
139 quantitative PCR. For this purpose, we purified HIV-1 cores by a method involving  
140 ultracentrifugation of concentrated virions through a layer of Triton X-100 detergent into  
141 a sucrose density gradient. Under these conditions, the virions are exposed to the  
142 detergent for only a brief time, thus preserving the integrity of the viral core. During  
143 centrifugation, HIV-1 cores sediment into the gradient, resulting in removal of the  
144 detergent. Cores were detected in gradient fractions by p24 ELISA for the CA protein  
145 (Fig. 1A), by assay for RT activity (Fig. 1B), and by negative-stain electron microscopy  
146 (Fig. 1C).

147

148           In initial studies, we attempted to improve the reaction efficiency by varying the  
149 temperature, reaction time, and pH. We also tested polyethylene glycols which have  
150 been previously reported to stimulate reverse transcription *in vitro* (23), and tested the  
151 effects of adding bovine serum albumin (BSA). After extended incubation at 37°C, the  
152 DNA products were purified and quantified for sequences corresponding to various  
153 stages of reverse transcription. An example of the results obtained in this type of  
154 experiment is shown in Fig. 2. Quantitative PCR (qPCR) analysis demonstrated that  
155 some of these parameters resulted in modest increase in overall ERT efficiency (based  
156 on the ratio of 2<sup>nd</sup> strand transfer products to minus strand strong stop molecules). In  
157 particular, the addition of bovine serum albumin appeared beneficial. Nonetheless,  
158 based on the quantitative analysis of each stage of reverse transcription, the overall  
159 efficiency of the reactions appeared to be limited by a marked attenuation in full-length  
160 minus strand synthesis. By contrast, both strand transfer events were relatively  
161 efficient. These results indicated that the cores initiated reverse transcription but were  
162 unable to synthesize the complete minus strand. Of note, the reactions required  
163 prolonged incubation times, suggesting the possibility that the viral capsid dissociated  
164 during the incubation, resulting in loss of RT, as previously observed (1).

165  
166           **IP6 promotes efficient minus strand synthesis in ERT reactions.** The cell  
167 metabolite IP6 was recently reported to bind to the HIV-1 capsid *in vitro* and to promote  
168 the assembly of recombinant CA protein into capsid-like structures (17, 18). Adding IP6  
169 to permeabilized HIV-1 particles resulted in protection of newly synthesized viral DNA  
170 from degradation by DNaseI. By stabilizing the viral capsid, IP6 may prevent access of



171 the nuclease to the nascent viral DNA. However, in that study, addition of IP6 did not  
172 enhance ERT when performed in the absence of DNaseI. To test whether capsid  
173 stabilization by IP6 can enable efficient ERT, we performed reactions in the presence of  
174 a range of IP6 concentrations (Fig. 3). We observed a marked enhancement of full-  
175 length minus strand synthesis and increased overall efficiency of the reaction in the  
176 presence of low micromolar concentrations of IP6. These results indicate that IP6  
177 increases the efficiency of ERT.

178

179       Following this observation, we optimized several parameters in reactions  
180 containing 10  $\mu$ M IP6, including NaCl and MgCl<sub>2</sub> concentrations and pH. We thus  
181 identified conditions for efficient ERT: 10 mM Tris-HCl pH 7.6, 150 mM NaCl, 2 mM  
182 MgCl<sub>2</sub>, 1 mg/ml BSA, 0.5 mM DTT, and 10  $\mu$ M IP6, with incubation at 37°C for 16h.  
183 Under these conditions, we reproducibly observed conversion of 35 to 40% of the minus  
184 strand strong stop products into molecules that also contained HIV-1 sequences that  
185 are synthesized only after the second-strand transfer step (Fig. 4). This was the  
186 maximum ERT efficiency we observed in multiple experiments with different  
187 preparations of cores.

188

189       **Kinetics of the ERT reaction.** We also analyzed the rates of product formation  
190 in ERT reactions under the optimized conditions. Minus strand strong stop and 1<sup>st</sup>  
191 strand-transfer products were synthesized rapidly in reactions containing IP6, reaching  
192 half-maximal values within 2 h (Fig. 5A). By contrast, synthesis of full-length minus  
193 strand and 2<sup>nd</sup> strand transfer products required 4 to 8 h to reach half-maximal values.

194 In reactions lacking IP6, both early product species were also 50% complete after 2 h,  
195 but declined slightly, suggesting the possibility of partial degradation (Fig. 5B). Late  
196 products were produced at 2 h in reactions lacking IP6 and declined thereafter. Late  
197 products were then slightly increased at the 16h time point, suggesting that degradation  
198 may compete with ongoing synthesis. While IP6 stimulated the synthesis of early  
199 products up to ten-fold, the effect on late stage reverse transcripts was profound,  
200 enhancing product accumulation by several thousand-fold (Fig. 4, compare panels A  
201 and B). PCR quantification of the 16h ERT products generated in the absence of IP6  
202 using primers spanning the genome revealed that extension of the minus strand was  
203 impaired with few DNA products longer than 3 kb accumulating in the reactions (Fig.  
204 5C).

205  
206 **Hexacarboxybenzene stimulates ERT.** We also tested the synthetic hexavalent  
207 compound hexacarboxybenzene (HCB) in ERT reactions, owing to a previous report  
208 that HCB stabilizes HIV-1 cores *in vitro* (24). Addition of HCB markedly enhanced  
209 minus strand synthesis at an optimal concentration of ~100  $\mu$ M, resulting in efficient  
210 ERT (Fig. 6A). However, HCB inhibited all stages of ERT when present at a  
211 concentration of 1 mM (Fig. 6B), consistent with a previous study reporting inhibition of  
212 ERT inhibition by 20 mM HCB (24).

213  
214 To determine whether IP6 and HCB stabilize the HIV-1 capsid during ERT, we  
215 analyzed the quantity of HIV-1 CA and RT released from viral cores in reactions  
216 containing these compounds. Following a 6 h reaction time, the reactions were diluted

217 with cold buffer and subjected to ultracentrifugation to separate the soluble proteins  
218 from those which remained core associated. Quantification of the fraction of the total  
219 CA present in the pellets revealed higher levels of pelletable CA protein in reactions  
220 containing IP6 or HCB, indicating that the viral capsid was stabilized by the compound  
221 (Fig. 7). Similarly, assays of RT activity in the supernatants and pellets showed that IP6  
222 and HCB increased the levels of pelletable RT in the reactions. Collectively, these  
223 results suggest that the enhancing effects of IP6 and HCB on ERT result from  
224 stabilization of the viral capsid.

225

226 **Cores from an HIV-1 mutant with a hyperstable capsid undergo efficient**  
227 **ERT in the absence of added capsid stabilizers.** We also asked whether genetic  
228 stabilization of the HIV-1 capsid affects the dependence of ERT on IP6. For this  
229 purpose, we isolated cores from HIV-1 particles containing the capsid-stabilizing CA  
230 substitution E45A. This mutant is competent for reverse transcription in target cells but  
231 is poorly infectious, owing to impaired nuclear entry and integration (4). Cores from the  
232 mutant are hyperstable *in vitro*, as inferred from their increased levels of core-  
233 associated CA and slower dissociation of CA during incubation at 37°C (1). In reactions  
234 containing IP6, the mutant cores exhibited efficient ERT, as did those from the wild type  
235 (Fig. 8). In reactions lacking IP6, E45A cores produced approximately 20% of the late  
236 stage products relative to parallel reactions containing IP6. This is in stark contrast to  
237 reactions with wild type cores, in which synthesis of late products was less than 0.1% of  
238 that observed in reactions containing IP6. These results indicate that E45A mutant  
239 cores are capable of synthesizing substantial quantities of late reverse transcripts in the

240 absence of capsid-stabilizing agents, further indicating that the ERT-stimulating activity  
241 of IP6 results from stabilization of the viral capsid.

242

243 **The capsid-targeting compound PF74 inhibits ERT in a concentration-**  
244 **dependent manner.** Finally, we tested the effects of the capsid-targeting antiviral  
245 compound PF74. PF74 binds to a site in the CA hexamer that is distinct from that  
246 bound by IP6 (25, 26). When present during HIV-1 infection at concentrations of 10  $\mu\text{M}$   
247 and above, PF74 inhibits reverse transcription and destabilizes the viral capsid (27).  
248 Addition of 10  $\mu\text{M}$  PF74 inhibited ERT in reactions containing IP6 (Fig. 9), further linking  
249 capsid function to ERT efficiency. By contrast, addition of 1  $\mu\text{M}$  PF74 did not  
250 substantially inhibit ERT, consistent with previous reports that at low concentrations  
251 PF74 inhibits HIV-1 infection by affecting nuclear entry and integration (28-30). These  
252 results further support a role of the viral capsid in ERT.

253

## 254 **DISCUSSION**

255 In this study, we observed that addition of IP6 stabilizes HIV-1 cores and markedly  
256 enhances the efficiency of reverse transcription *in vitro*. Mallery and coworkers had  
257 previously shown that IP6 stabilizes purified HIV-1 cores and protects the products of  
258 ERT from degradation by added DNaseI, suggesting that the capsid provides a barrier  
259 to access to the synthesized DNA (18). In that study, IP6 did not appear to substantially  
260 alter the quantity of DNA products in the absence of added DNase. We also observed  
261 no enhancing effect of 1 mM IP6 on ERT. By contrast, addition of low concentrations of  
262 IP6 resulted in a nearly quantitative conversion of the initial minus strand products to

263 full-length molecules. The observed enhancement resulted from a thousand-fold  
264 increase in minus strand synthesis together with modest enhancements at both strand  
265 transfer steps. We conclude that IP6 mainly promotes the completion of minus strand  
266 synthesis. The maximum efficiency of these reactions was ~40% based on the ratio of  
267 2<sup>nd</sup> strand transfer products relative to minus strand strong stop molecules. Our  
268 observations suggest that purified cores can, under appropriate conditions, undergo  
269 efficient reverse transcription *in vitro* in the absence of added host proteins.

270

271 IP6 and the synthetic compound HCB also stabilized the association of CA and  
272 RT with viral cores, as previously observed in imaging studies of permeabilized virions.  
273 Thus, a plausible mechanistic conclusion is that the observed enhancement of ERT  
274 resulted from capsid stabilization, because most HIV-1 mutants containing intrinsically  
275 unstable capsids are impaired for reverse transcription in target cells (1). We also  
276 observed that mutant HIV-1 cores with hyperstable capsids synthesized substantial  
277 quantities of full-length minus strand DNA in reactions lacking IP6. Finally, we observed  
278 that the capsid-destabilizing HIV-1 inhibitor PF74 inhibited ERT even in the presence of  
279 IP6. Together, these observations support a capsid-stabilization mechanism for  
280 enhancement of ERT by IP6.

281

282 How might stabilization of the viral capsid help promote the completion of reverse  
283 transcription? In our experiments, the addition of IP6 resulted in a profound  
284 enhancement of minus strand DNA synthesis with lesser effects on the other steps that  
285 were quantified, including both strand transfers. In earlier work, our group showed that

286 spontaneous uncoating of purified HIV-1 cores *in vitro* is characterized by dissociation  
287 of both CA and RT from the viral core (1). We suggest that the capsid acts as a  
288 container to retain RT during synthesis of the long (~9 kb) minus strand DNA. HIV-1  
289 particles are estimated to contain approximately 50 molecules of RT (7), with about 20%  
290 of the enzyme copurifying with cores (Fig. 1B). While completion of reverse transcription  
291 is theoretically possible with a single molecule of the enzyme, the relatively low  
292 processivity of the enzyme together with its frequent pausing suggest that RT must  
293 repeatedly rebind the template in order to synthesize full-length viral DNA. By  
294 preserving the association of RT with the core, the viral capsid may ensure that RT is  
295 maintained at a sufficient concentration to allow completion of the reaction. This  
296 “container model” does not exclude additional possible functions of the capsid in  
297 reverse transcription, such as providing a scaffold on which the reaction occurs.

298

299 IP6 is a natural metabolite that is present in mammalian cells at concentrations  
300 ranging from 40 to 90  $\mu\text{M}$  (31), coinciding well with the ERT-enhancing effects we  
301 observed in the present study. Therefore, one could expect that HIV-1 infection would  
302 be strongly depending on target cell levels of IP6 and/or the related metabolite IP5.  
303 However, a recent study reported that ablation of cell expression of host proteins that  
304 synthesize these compounds does not appreciably influence their susceptibility to HIV-1  
305 infection (32). These studies were performed in a transformed epithelial cell line, and it  
306 will be important to determine whether these inositol phosphates influence HIV-1  
307 infection of physiologically relevant target cells. Additionally, purified HIV-1 cores

308 appear to contain substantial quantities of bound IP6 (18), suggesting that the viral  
309 capsid may be stabilized by the IP6 it captures during assembly.

310

311 Reverse transcription is thought to promote HIV-1 uncoating in target cells, and it  
312 leads to physical changes in HIV-1 cores *in vitro* (33-35). The ERT reaction described  
313 herein mimics the kinetics of reverse transcription observed during synchronous HIV-1  
314 infection of target cells (36), albeit without the initial lag phase, which presumably  
315 results from the requirement for virus fusion. Moreover, the reaction appears to be  
316 highly synchronous, with early DNA products appearing rapidly and the subsequent  
317 products accumulating only after a substantial delay. The experimental system  
318 described herein should enable structural and biochemical studies of native HIV-1  
319 reverse transcription complexes and analysis of the role of the viral capsid in the  
320 process, including high-resolution analysis of the effects of reverse transcription on the  
321 structure of the viral core. ERT reactions with purified cores may also permit the  
322 generation of substantial quantities of pure and active HIV-1 PICs *in vitro* for  
323 biochemical studies of HIV-1 integration.

324

325 **Materials and Methods**

326

327 **Chemicals, cells, and plasmids.** Inositol hexakisphosphate was purchased as a 1.1M

328 solution from TCI America (cat. No. P0409). D-myo-Inositol-1,3,4,5,6-

329 pentakisphosphate (ammonium salt) was purchased from Cayman Chemical (cat. No.

330 10009851). Tris, mellitic acid, and polyethylene glycol 3350 were purchased from

331 Sigma. Deoxynucleoside triphosphates (dNTPs) were purchased from New England

332 Biolabs as 100 mM solutions. Bovine serum albumin was purchased from RPI (cat. No.

333 A30075). The following antibodies were used for probing immunoblots: 183-H12-5C

334 (NIH AIDS Research and Reference Program (37), used at 4 µg/ml); HIV-1 NC

335 (polyclonal goat serum, from Dr. Robert Gorelick, used at a 1:1000 dilution); HIV-1 RT;

336 HIV-1 IN (polyclonal rabbit serum, received from Dr. Alan Engelman, used at a 1:5000

337 dilution). The IR dye-conjugated polyclonal secondary antibodies were purchased from

338 Li-Cor, Inc. The antiviral compound PF74 was synthesized and purified by the Chemical

339 Synthesis Core of the Vanderbilt University Institute for Chemical Biology. For qPCR,

340 the Maxima SYBR Green/ROX qPCR Master Mix (2X) from ThermoScientific (Cat.

341 #K0233) was used. Custom oligodeoxyribonucleotides were purchased from Integrated

342 DNA Technologies.

343

344 **Purification and analysis of HIV-1 cores.** For most experiments, HIV-1 cores were

345 purified from 200 ml of virus particles collected from infected MT4 cells. Cultured MT4

346 cells ( $1 \times 10^7$ ) were pelleted and resuspended in 50 ml of medium. Cultures were

347 inoculated wild type HIV-1 particles produced by transfection of 293T cells with the wild



348 type R9 proviral construct. A quantity of the virus stock, corresponding to approximately  
349 5  $\mu$ g of p24, was added to the MT4 cultures with DEAE-dextran at a final concentration  
350 of 20  $\mu$ g/ml. The following day, the cells were pelleted and resuspended in 200 ml of  
351 fresh culture medium. The cultures were examined daily signs of virus-induced  
352 cytopathicity, and at day 4- to 5 after inoculation, the cultures were centrifuged to  
353 remove cells and cell debris. The virus-containing culture supernatants were clarified by  
354 filtration and concentrated by ultracentrifugation at 32,000 rpm in a Beckman SW32.1Ti  
355 rotor at 4°C for 3h. Concentrated virions were resuspended in a total volume of 0.5 ml.

356 For experiments shown in Figure 8, HIV-1 cores were purified from virions  
357 produced by transfection of 293T cells, as previously described (38), with the following  
358 modifications. Four million 293T cells were transfected with 10  $\mu$ g of R9 and R9.E45A  
359 plasmid DNAs using polyethyleneimine (39). The next day, cultures were washed and  
360 replenished with fresh medium. The following day, the culture supernatants were  
361 collected, clarified by filtration through a 0.45  $\mu$ m vacuum filtration device, treated with  
362 20  $\mu$ g/ml DNaseI and 10 mM MgCl<sub>2</sub> at 37°C for one hour to eliminate residual carryover  
363 plasmid DNA, then concentrated for purification of viral cores.

364 To purify cores, concentrated HIV-1 particles were subjected to centrifugation  
365 through a layer of Triton X-100 (1% vol/vol) into a linear sucrose density gradient, as  
366 previously described (38). Fractions (1 ml) were collected and assayed for CA protein  
367 by p24 ELISA and RT activity. The dense fractions corresponding to HIV-1 cores  
368 typically contained approximately 15% of the total CA protein in the gradients. Fractions  
369 containing HIV-1 cores were aliquoted, flash frozen in liquid nitrogen, and stored  
370 at -80°C for ERT reactions and other assays.

371 Negative stain electron microscopy of purified cores was performed by applying  
372 3-5  $\mu$ l samples of core preparations directly to glow-discharged carbon-coated copper  
373 EM grids. Following one minute of adherence, the excess liquid was removed by  
374 wicking, and the grids were inverted for one minute onto two consecutive droplets  
375 containing uranyl formate stain, followed by two consecutive inversions onto water  
376 droplets. The liquid was carefully removed by wicking, and the grids were air-dried and  
377 imaged in a Morgagni electron microscope. Images were captured using a CCD  
378 camera.

379 For immunoblot analysis of HIV-1 cores, 15  $\mu$ l volumes of the gradient fractions  
380 were separated by electrophoresis on precast 4-20% polyacrylamide gels (Genscript).  
381 The proteins were transferred to nitrocellulose membrane, blocked with a solution of  
382 nonfat dry milk in TBST, and sequentially probed with antiserum to HIV-1 RT, IN, and  
383 CA proteins. Following probing of the blots with the appropriate IR dye-conjugated  
384 secondary antiserum, the corresponding HIV-1 protein bands were visualized by  
385 scanning the blots in a Li-Cor Odyssey imager.

386  
387 **Assays of ERT using purified HIV-1 cores.** ERT reactions were performed in 50  $\mu$ l  
388 volumes containing 10 mM Tris-HCl pH 7.6, 150 mM NaCl, 2 mM MgCl<sub>2</sub>, 0.5 mM  
389 dithiothreitol, 0.1 mM each of 4 dNTPs, 1 mg/ml bovine serum albumin, and various  
390 concentrations of additives including IP6, mellitic acid, PEG-3350, and PF74. Reactions  
391 were normally incubated at 37°C for 16h, after which the DNA was extracted using a  
392 silica gel-based method (40) and eluted in water. The products were quantified by  
393 qPCR with SYBR green detection using the primers listed in Table 1:

394

395 Table 1. Primers used for quantification of HIV-1 reverse transcripts

| Stage of reverse transcription | Primer sequence                  | Position in provirus sequence |
|--------------------------------|----------------------------------|-------------------------------|
| Minus-strand strong stop       | 5'-GCCTCAATAAAGCTTGCCTTGA-3'     | 522-543 (F)                   |
|                                | 5'-TGACTAAAAGGGTCTGAGGGATCT-3'   | 592-615 (R)                   |
| First strand transfer          | 5'-GAGCCCTCAGATCCTGCATAT-3'      | 9493-9513 (F)                 |
|                                | 5'-CCACACTGACTAAAAGGGTCTGAG-3'   | 9682-9705 (R)                 |
| Full-length minus strand       | 5'-CTAGAACGATTGCGAGTTAATCCT-3'   | 909-932 (F)                   |
|                                | 5'-CTATCCTTTGATGCACACAATAGAG-3'  | 1041-1065 (R)                 |
| Second strand transfer         | 5'-TGTGTGCCCGTCTGTTGTGT-3'       | 557-576 (F)                   |
|                                | 5'-GAGTCCTGCGTCGAGAGAGC-3'       | 677-696 (R)                   |
| Minus strand (8900)            | 5'-AGGGAAAGAATGAGACGAGC-3'       | 8835-8854 (F)                 |
|                                | 5'-GCTACTTGTGATTGCTCCATG-3'      | 8904-8924 (R)                 |
| Minus strand (7500)            | 5'-TGGAGTACTGAAGGGTCAAATAAC-3'   | 7412-7435 (F)                 |
|                                | 5'-ACTTCCTGCCACATGTTTATAAATTG-3' | 7478-7503 (R)                 |
| Minus strand (6000)            | 5'-TTGTTTCATGACAAAAGCCTTAGG-3'   | 5937-5960 (F)                 |
|                                | 5'-GTCTGACTGTTCTGATGAGCTC-3'     | 5999-6020 (R)                 |
| Minus strand (4500)            | 5'-GGCAGCTAGATTGTACACATTTAG-3'   | 4441-4434 (F)                 |
|                                | 5'-TGCTGGAATTACTTCTGCTTCT-3'     | 4481-4502 (R)                 |
| Minus strand (2900)            | 5'-GCAGGGTTAAAACAGAAAAATCAG-3'   | 2841-2865 (F)                 |
|                                | 5'-CCTGAAGTCTTTATCTAAGGGAAGT-3'  | 2899-2924 (R)                 |
| Minus strand (1400)            | 5'-ACCATGCTAACACAGTGGG-3'        | 1345-1364 (F)                 |
|                                | 5'-AGCTTCCTCATTGATGGTCTC-3'      | 1396-1416 (R)                 |

396

397 Quantitative PCR reactions were performed in 20  $\mu$ l volumes with a Stratagene

398 Mx3000p real time thermal cycler according to the following program: 95° for 10 min (1

399 cycle) followed by 95°C for 30s, 55° for 1 min, and 72° for one min (40 cycles). DNA

400 copy numbers were interpolated from standard curves of  $C_t$  values generated from

401 reactions containing dilutions of R9 proviral plasmid DNA, performed in parallel.

402

403 **Uncoating Assays.** ERT reactions (50  $\mu$ l) were incubated at 37°C for 6h, diluted with

404 450  $\mu$ l cold reaction buffer lacking dNTPs, and subjected to centrifugation at 100,000  $\times g$

405 in a Beckman TLA-55 rotor. Control reactions were diluted and pelleted immediately

406 after mixing. The supernatants were withdrawn and transferred to clean tubes, and the

407 pellets were resuspended in ERT reaction buffer (0.5 ml). The supernatants and pellets

408 were assayed for CA protein by p24 ELISA (41) and for RT activity using an exogenous  
409 primer-template assay, as previously described (42). The resulting values were used to  
410 calculate the fraction of pelleted CA and RT activity in the samples.

411

## 412 **Acknowledgments**

413

414 This work was supported by NIH grants R56 AI076121 and P50 AI150481 (Pittsburgh  
415 Center for HIV-Protein Interactions). We thank the staff of the Vanderbilt Cryo-Electron  
416 Microscopy Facility for training and facilities for electron microscopy and Dr. Greg Sowd  
417 for critical reading of the manuscript.

418 **References**

419

- 420 1. **Forshey BM, von Schwedler U, Sundquist WI, Aiken C.** 2002. Formation of a  
421 human immunodeficiency virus type 1 core of optimal stability is crucial for viral  
422 replication. *J Virol* **76**:5667-5677.
- 423 2. **Yufenyuy EL, Aiken C.** 2013. The NTD-CTD intersubunit interface plays a  
424 critical role in assembly and stabilization of the HIV-1 capsid. *Retrovirology*  
425 **10**:29.
- 426 3. **Dismuke DJ, Aiken C.** 2006. Evidence for a functional link between uncoating of  
427 the human immunodeficiency virus type 1 core and nuclear import of the viral  
428 preintegration complex. *J Virol* **80**:3712-3720.
- 429 4. **Yang R, Shi J, Byeon IJ, Ahn J, Sheehan JH, Meiler J, Gronenborn AM,**  
430 **Aiken C.** 2012. Second-site suppressors of HIV-1 capsid mutations: restoration  
431 of intracellular activities without correction of intrinsic capsid stability defects.  
432 *Retrovirology* **9**:30.
- 433 5. **Stremlau M, Perron M, Lee M, Li Y, Song B, Javanbakht H, Diaz-Griffero F,**  
434 **Anderson DJ, Sundquist WI, Sodroski J.** 2006. Specific recognition and  
435 accelerated uncoating of retroviral capsids by the TRIM5alpha restriction factor.  
436 *Proc Natl Acad Sci U S A* **103**:5514-5519.
- 437 6. **Roa A, Hayashi F, Yang Y, Lienlaf M, Zhou J, Shi J, Watanabe S, Kigawa T,**  
438 **Yokoyama S, Aiken C, Diaz-Griffero F.** 2012. RING domain mutations  
439 uncouple TRIM5alpha restriction of HIV-1 from inhibition of reverse transcription  
440 and acceleration of uncoating. *J Virol* **86**:1717-1727.

- 441 7. **Hu WS, Hughes SH.** 2012. HIV-1 reverse transcription. Cold Spring Harb  
442 Perspect Med **2**.
- 443 8. **Dharan A, Bachmann N, Talley S, Zwickelmaier V, Campbell EM.** 2020.  
444 Nuclear pore blockade reveals that HIV-1 completes reverse transcription and  
445 uncoating in the nucleus. Nat Microbiol doi:10.1038/s41564-020-0735-8.
- 446 9. **Farnet CM, Haseltine WA.** 1990. Integration of human immunodeficiency virus  
447 type 1 DNA in vitro. Proc Natl Acad Sci U S A **87**:4164-4168.
- 448 10. **Monserate JP, York JD.** 2010. Inositol phosphate synthesis and the nuclear  
449 processes they affect. Curr Opin Cell Biol **22**:365-373.
- 450 11. **Shen X, Xiao H, Ranallo R, Wu WH, Wu C.** 2003. Modulation of ATP-  
451 dependent chromatin-remodeling complexes by inositol polyphosphates. Science  
452 **299**:112-114.
- 453 12. **Montpetit B, Thomsen ND, Helmke KJ, Seeliger MA, Berger JM, Weis K.**  
454 2011. A conserved mechanism of DEAD-box ATPase activation by nucleoporins  
455 and InsP6 in mRNA export. Nature **472**:238-242.
- 456 13. **Alcazar-Roman AR, Tran EJ, Guo S, Wente SR.** 2006. Inositol  
457 hexakisphosphate and Gle1 activate the DEAD-box protein Dbp5 for nuclear  
458 mRNA export. Nat Cell Biol **8**:711-716.
- 459 14. **Brehm MA, Klemm U, Rehbach C, Erdmann N, Kolsek K, Lin H, Aponte-**  
460 **Santamaria C, Grater F, Rauch BH, Riley AM, Mayr GW, Potter BVL,**  
461 **Windhorst S.** 2019. Inositol hexakisphosphate increases the size of platelet  
462 aggregates. Biochem Pharmacol **161**:14-25.

- 463 15. **Wickner RB, Kelly AC, Bezsonov EE, Edskes HK.** 2017. [PSI+] prion  
464 propagation is controlled by inositol polyphosphates. *Proc Natl Acad Sci U S A*  
465 **114**:E8402-E8410.
- 466 16. **Wei H, Landgraf D, Wang G, McCarthy MJ.** 2018. Inositol polyphosphates  
467 contribute to cellular circadian rhythms: Implications for understanding lithium's  
468 molecular mechanism. *Cell Signal* **44**:82-91.
- 469 17. **Dick RA, Zadrozny KK, Xu C, Schur FKM, Lyddon TD, Ricana CL, Wagner**  
470 **JM, Perilla JR, Ganser-Pornillos BK, Johnson MC, Pornillos O, Vogt VM.**  
471 2018. Inositol phosphates are assembly co-factors for HIV-1. *Nature* **560**:509-  
472 512.
- 473 18. **Mallery DL, Marquez CL, McEwan WA, Dickson CF, Jacques DA,**  
474 **Anandapadamanaban M, Bichel K, Towers GJ, Saiardi A, Bocking T, James**  
475 **LC.** 2018. IP6 is an HIV pocket factor that prevents capsid collapse and  
476 promotes DNA synthesis. *Elife* **7**.
- 477 19. **Yong WH, Wyman S, Levy JA.** 1990. Optimal conditions for synthesizing  
478 complementary DNA in the HIV-1 endogenous reverse transcriptase reaction.  
479 *Aids* **4**:199-206.
- 480 20. **Warrilow D, Meredith L, Davis A, Burrell C, Li P, Harrich D.** 2008. Cell factors  
481 stimulate human immunodeficiency virus type 1 reverse transcription in vitro. *J*  
482 *Virol* **82**:1425-1437.
- 483 21. **Borroto-Esoda K, Boone LR.** 1991. Equine infectious anemia virus and human  
484 immunodeficiency virus synthesis in vitro: characterization of the endogenous  
485 reverse transcriptase reaction. *J Virol* **65**:1952-1959.

- 486 22. **Fassati A, Goff SP.** 2001. Characterization of intracellular reverse transcription  
487 complexes of human immunodeficiency virus type 1. *J Virol* **75**:3626-3635.
- 488 23. **Chan EW, Dale PJ, Greco IL, Rose JG, O'Connor TE.** 1980. Effects of  
489 polyethylene glycol on reverse transcriptase and other polymerase activities.  
490 *Biochim Biophys Acta* **606**:353-361.
- 491 24. **Jacques DA, McEwan WA, Hilditch L, Price AJ, Towers GJ, James LC.** 2016.  
492 HIV-1 uses dynamic capsid pores to import nucleotides and fuel encapsidated  
493 DNA synthesis. *Nature* **536**:349-353.
- 494 25. **Bhattacharya A, Alam SL, Fricke T, Zadrozny K, Sedzicki J, Taylor AB,**  
495 **Demeler B, Pornillos O, Ganser-Pornillos BK, Diaz-Griffero F, Ivanov DN,**  
496 **Yeager M.** 2014. Structural basis of HIV-1 capsid recognition by PF74 and  
497 CPSF6. *Proc Natl Acad Sci U S A* **111**:18625-18630.
- 498 26. **Price AJ, Jacques DA, McEwan WA, Fletcher AJ, Essig S, Chin JW,**  
499 **Halambage UD, Aiken C, James LC.** 2014. Host cofactors and pharmacologic  
500 ligands share an essential interface in HIV-1 capsid that is lost upon  
501 disassembly. *PLoS Pathog* **10**:e1004459.
- 502 27. **Shi J, Zhou J, Shah VB, Aiken C, Whitby K.** 2011. Small-molecule inhibition of  
503 human immunodeficiency virus type 1 infection by virus capsid destabilization. *J*  
504 *Virol* **85**:542-549.
- 505 28. **Saito A, Ferhadian D, Sowd GA, Serrao E, Shi J, Halambage UD, Teng S,**  
506 **Soto J, Siddiqui MA, Engelman AN, Aiken C, Yamashita M.** 2016. Roles of  
507 Capsid-Interacting Host Factors in Multimodal Inhibition of HIV-1 by PF74. *J Virol*  
508 **90**:5808-5823.



- 509 29. **Peng K, Muranyi W, Glass B, Laketa V, Yant SR, Tsai L, Cihlar T, Muller B,**  
510 **Krausslich HG.** 2014. Quantitative microscopy of functional HIV post-entry  
511 complexes reveals association of replication with the viral capsid. *Elife* **3**:e04114.
- 512 30. **Balasubramaniam M, Zhou J, Addai A, Martinez P, Pandhare J, Aiken C,**  
513 **Dash C.** 2019. PF74 Inhibits HIV-1 Integration by Altering the Composition of the  
514 Preintegration Complex. *J Virol* **93**.
- 515 31. **Bunce CM, French PJ, Allen P, Mountford JC, Moor B, Greaves MF, Michell**  
516 **RH, Brown G.** 1993. Comparison of the levels of inositol metabolites in  
517 transformed haemopoietic cells and their normal counterparts. *Biochem J* **289** (  
518 **Pt 3**):667-673.
- 519 32. **Mallery DL, Faysal KMR, Kleinpeter A, Wilson MSC, Vaysburd M, Fletcher**  
520 **AJ, Novikova M, Bocking T, Freed EO, Saiardi A, James LC.** 2019. Cellular  
521 IP6 Levels Limit HIV Production while Viruses that Cannot Efficiently Package  
522 IP6 Are Attenuated for Infection and Replication. *Cell Rep* **29**:3983-3996 e3984.
- 523 33. **Hulme AE, Perez O, Hope TJ.** 2011. Complementary assays reveal a  
524 relationship between HIV-1 uncoating and reverse transcription. *Proc Natl Acad*  
525 *Sci U S A* **108**:9975-9980.
- 526 34. **Rankovic S, Ramalho R, Aiken C, Rousso I.** 2018. PF74 Reinforces the HIV-1  
527 Capsid To Impair Reverse Transcription-Induced Uncoating. *J Virol* **92**.
- 528 35. **Rankovic S, Varadarajan J, Ramalho R, Aiken C, Rousso I.** 2017. Reverse  
529 Transcription Mechanically Initiates HIV-1 Capsid Disassembly. *J Virol* **91**.

- 530 36. **Karageorgos L, Li P, Burrell CJ.** 1995. Stepwise Analysis of Reverse  
531 Transcription in a Cell-to-Cell Human-Immunodeficiency-Virus Infection Model -  
532 Kinetics and Implications. *Journal of General Virology* **76**:1675-1686.
- 533 37. **Chesebro B, Wehrly K, Nishio J, Perryman S.** 1992. Macrophage-tropic  
534 human immunodeficiency virus isolates from different patients exhibit unusual V3  
535 envelope sequence homogeneity in comparison with T-cell-tropic isolates:  
536 definition of critical amino acids involved in cell tropism. *Journal of virology*  
537 **66**:6547-6554.
- 538 38. **Shah VB, Aiken C.** 2011. In vitro uncoating of HIV-1 cores. *J Vis Exp*  
539 doi:10.3791/3384.
- 540 39. **Durocher Y, Perret S, Kamen A.** 2002. High-level and high-throughput  
541 recombinant protein production by transient transfection of suspension-growing  
542 human 293-EBNA1 cells. *Nucleic Acids Res* **30**:E9.
- 543 40. **Liu X, Harada S.** 2013. DNA isolation from mammalian samples. *Curr Protoc*  
544 *Mol Biol* **Chapter 2**:Unit2 14.
- 545 41. **Wehrly K, Chesebro B.** 1997. p24 antigen capture assay for quantification of  
546 human immunodeficiency virus using readily available inexpensive reagents.  
547 *Methods* **12**:288-293.
- 548 42. **Aiken C.** 1997. Pseudotyping human immunodeficiency virus type 1 (HIV-1) by  
549 the glycoprotein of vesicular stomatitis virus targets HIV-1 entry to an endocytic  
550 pathway and suppresses both the requirement for Nef and the sensitivity to  
551 cyclosporin A. *Journal of Virology* **71**:5871-5877.
- 552

553 **FIGURE LEGENDS**

554

555 FIG 1 Characterization of purified HIV-1 cores. HIV-1 cores were isolated from  
556 concentrated virions by sucrose density gradient sedimentation. Gradient fractions were  
557 assayed for (A) CA protein and (B) RT activity. Panel C shows electron micrographs  
558 from negative stained samples of the three gradient fractions containing HIV-1 cores.

559

560 FIG 2 Representative results from an ERT experiment. HIV-1 cores were incubated for  
561 16h in a preliminary ERT reaction buffer containing the indicated concentrations of  
562 polyethylene glycol 3350. DNA was purified in the reactions and analyzed by qPCR for  
563 the indicated products of reverse transcription. This experiment was one of many early  
564 attempts to improve the efficiency of ERT.

565

566 FIG 3 IP6 markedly stimulates ERT in vitro by enhancing minus strand synthesis. ERT  
567 reactions containing the indicated concentrations of IP6 were incubated at 37°C for 16h,  
568 and DNA products were purified and quantified.

569

570 FIG 4 Optimization of the ERT reaction. ERT reactions containing 10  $\mu$ M IP6 and the  
571 indicated conditions were incubated and analyzed for HIV-1 DNA products. The  
572 variables were: (A) NaCl concentration, (B) pH, in reactions containing 150 mM, and (C)  
573 MgCl<sub>2</sub> concentration, in reactions at pH 7.6 with 150 mM NaCl.

574

575 FIG 5 Time course of ERT in the presence and absence of IP6. ERT reactions  
576 containing and lacking 10  $\mu$ M IP6 were incubated for the indicated time periods and  
577 subsequently analyzed for various HIV-1 DNA products by qPCR. (A) reactions  
578 containing IP6; (B) reactions lacking IP6. Values represent averages of duplicate ERT  
579 reactions. (C) Quantification of products in 16h reactions for sequences spanning the  
580 viral genome in reactions containing and lacking IP6. The blue and green symbols  
581 represent values from pairs of ERT reactions from two different experiments. Dashed  
582 lines connect values from ERT reactions lacking IP6. Results shown in this figure are  
583 from one of two independent experiments.

584

585 FIG 6 The capsid-stabilizing compound HCB also stimulates ERT. Reactions were  
586 containing the indicated concentrations of HCB were incubated for 16h at 37°C, and the  
587 products were analyzed by qPCR. Results shown are representative of two  
588 independent experiments.

589

590 FIG 7 IP6 and HCB stabilize viral cores during reverse transcription. ERT reactions  
591 containing no additive, 10 mM IP6, or 100 mM HCB not incubated or incubated at 37°C  
592 for six hours. Reactions were diluted tenfold with reaction buffer, and the cores were  
593 pelleted by ultracentrifugation and the pellets and supernatants analyzed for CA and RT  
594 activity. Shown is the fraction of the total CA and RT activity in the pellets. The values  
595 shown are the average values of duplicate reactions from one of two independent  
596 experiments, which showed similar outcomes.

597

598 FIG 8 Cores from the E45A HIV-1 mutant, which contains a hyperstable capsid, are less  
599 dependent on IP6 or HCB for ERT. Cores were purified from HIV-1 particles that had  
600 been produced by transfection of 293T cells. ERT reactions were performed with and  
601 without added IP6 or HCB.

602

603 FIG 9 The capsid-targeting antiviral compound PF74 inhibits ERT. Optimized ERT  
604 reactions containing indicated concentrations of PF74 were incubated for 16h.  
605 DNA products were purified and analyzed for HIV-1 sequences by qPCR. These results  
606 are representative of 3 independent experiments.

607

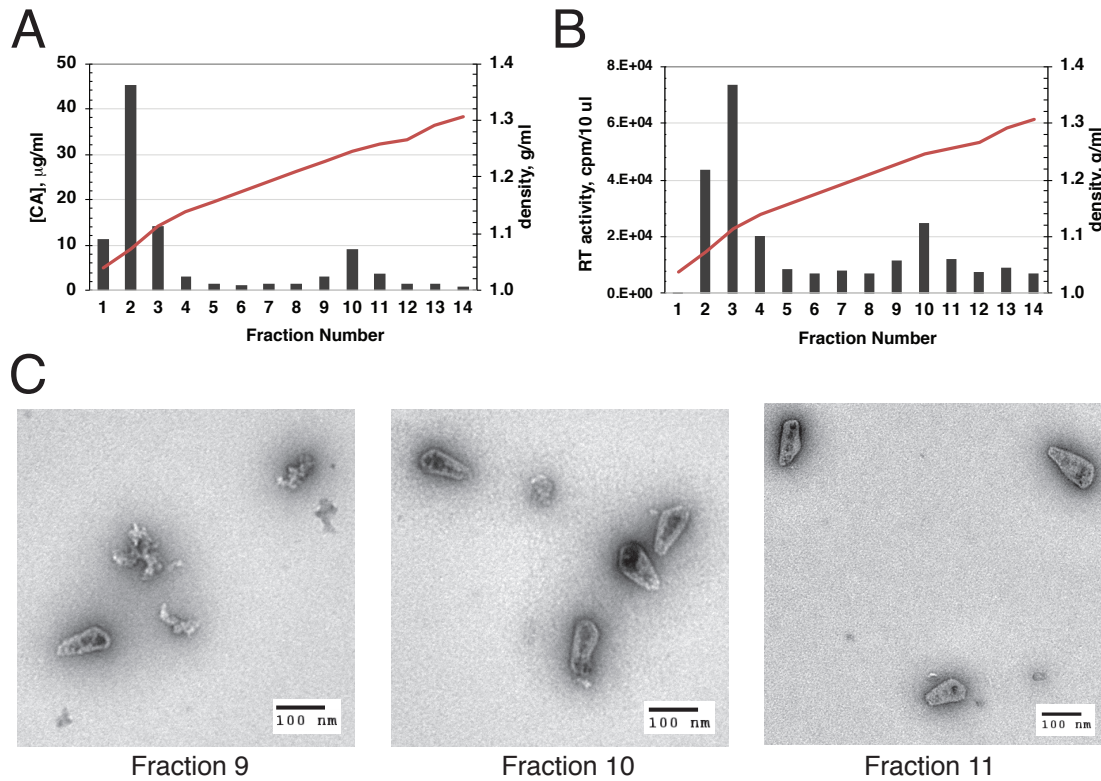

FIG 1 Characterization of purified HIV-1 cores. HIV-1 cores were isolated from concentrated virions by sucrose density gradient sedimentation. Gradient fractions were assayed for (A) CA protein and (B) RT activity. Panel C shows electron micrographs from negative stained samples of the three gradient fractions containing HIV-1 cores.

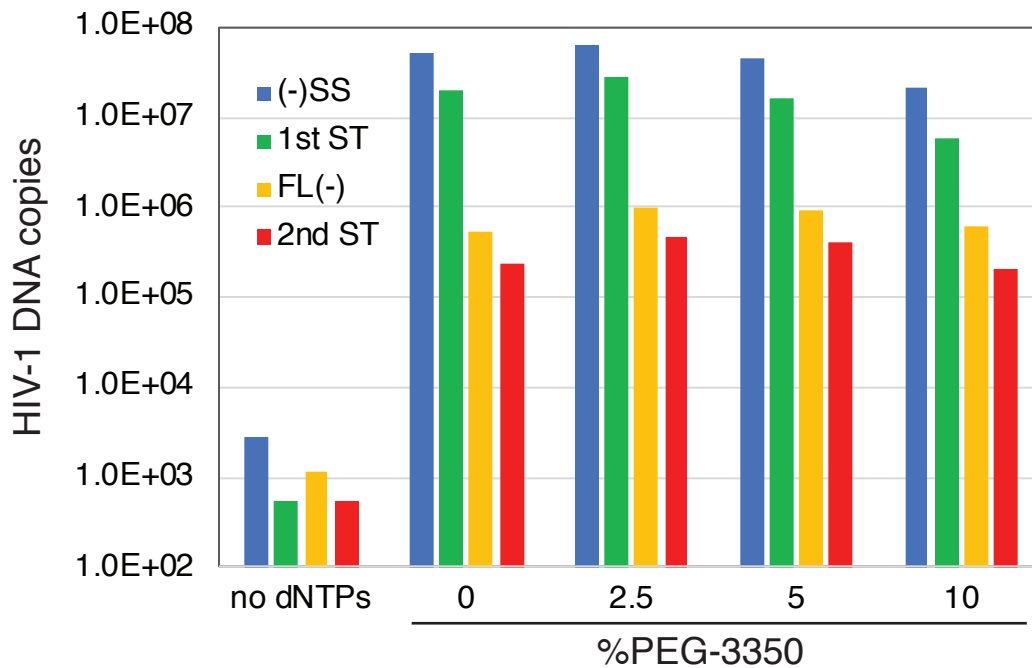

FIG 2 Representative results from an ERT experiment. HIV-1 cores were incubated for 16h in a preliminary ERT reaction buffer containing the indicated concentrations of polyethylene glycol 3350. DNA was purified in the reactions and analyzed by qPCR for the indicated products of reverse transcription. This experiment was one of many early attempts to improve the efficiency of ERT.

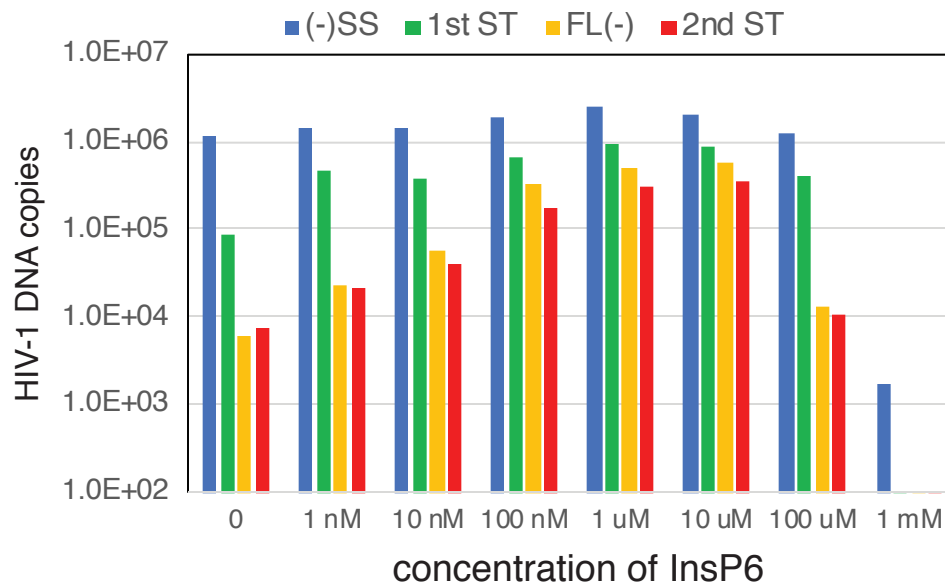

FIG 3 IP6 markedly stimulates ERT in vitro by enhancing minus strand synthesis. ERT reactions containing the indicated concentrations of IP6 were incubated at 37°C for 16h, and DNA products were purified and quantified.



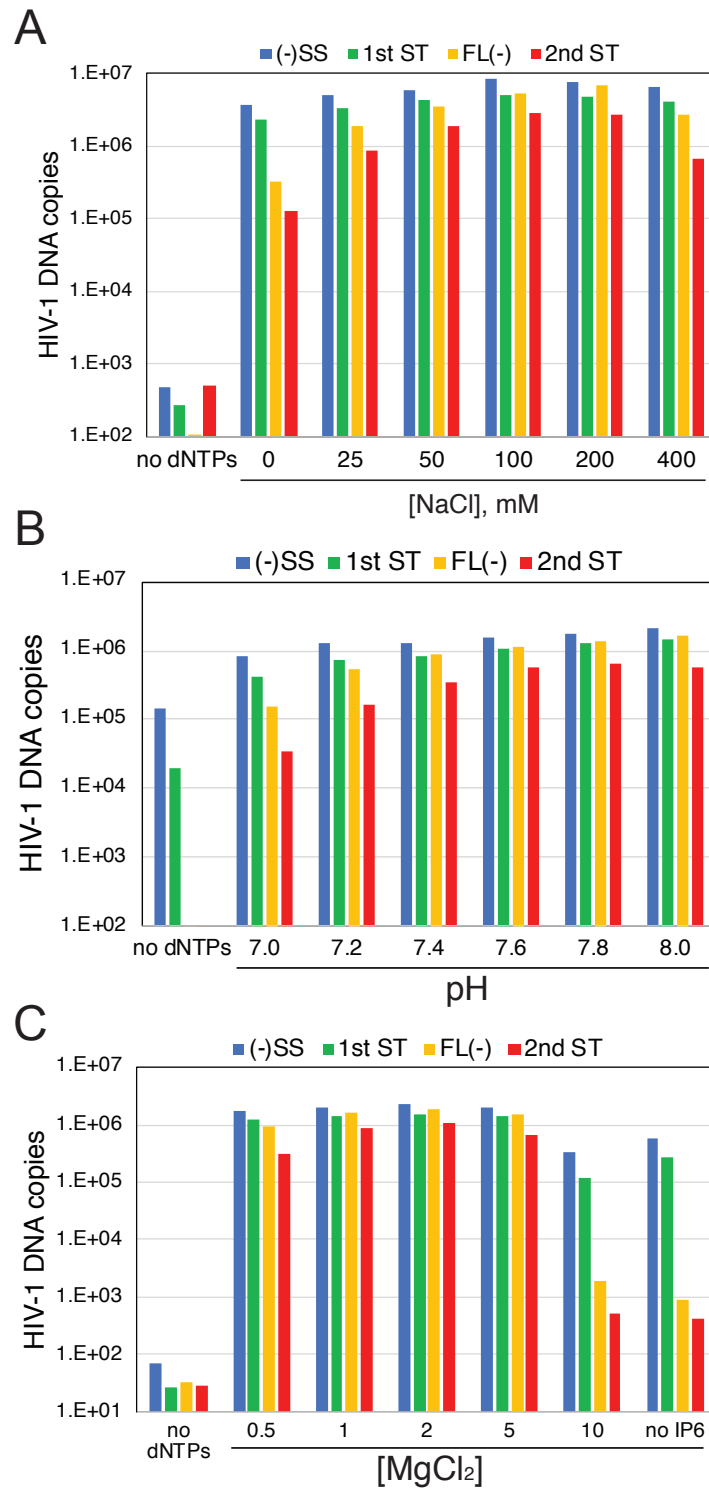

FIG 4 Optimization of the ERT reaction. ERT reactions containing 10  $\mu$ M IP6 and the indicated parameters were incubated and analyzed for HIV-1 DNA products. The variables were: (A) NaCl concentration, (B) pH, in reactions containing 150 mM, and (C) MgCl<sub>2</sub> concentration, in reactions at pH 7.6 with 150 mM NaCl.

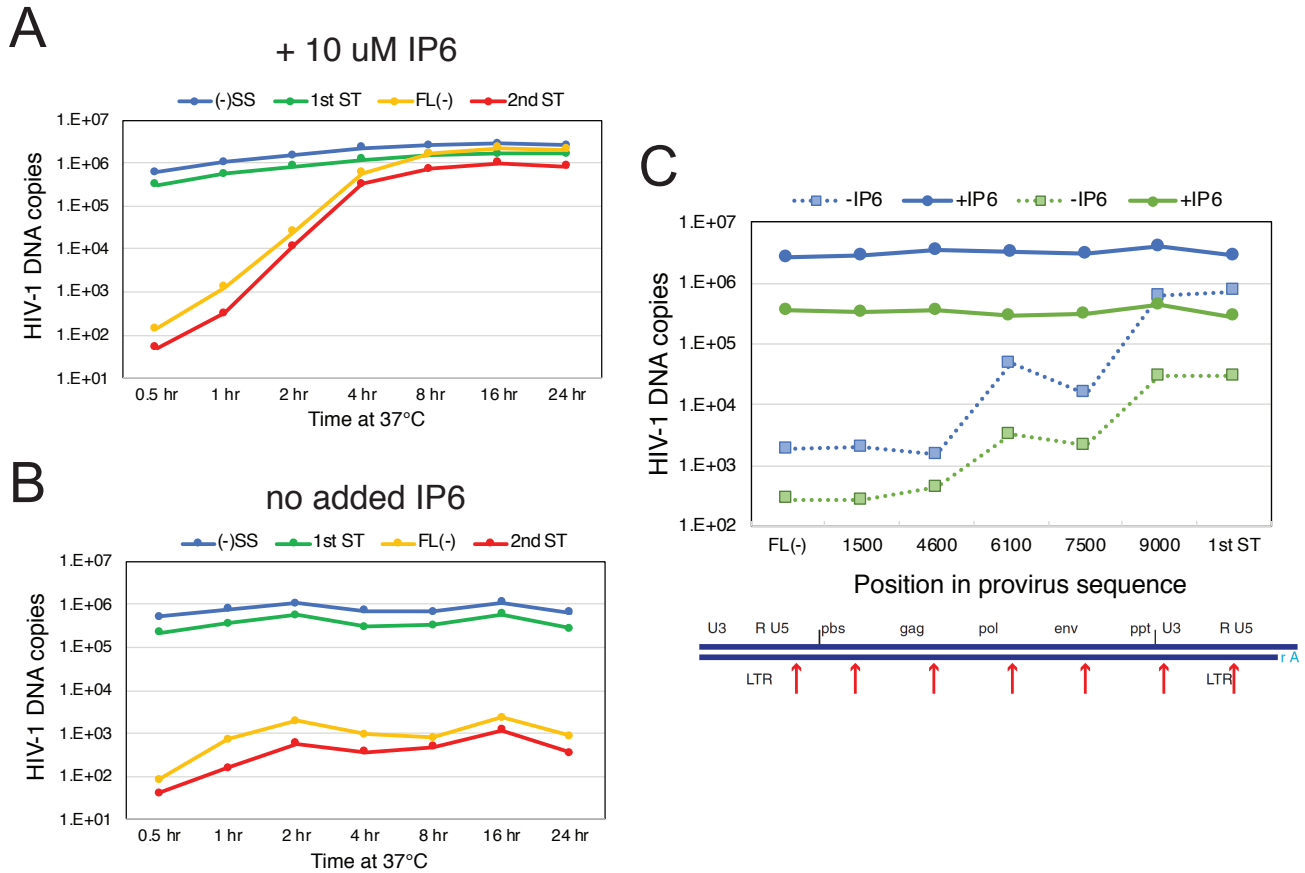

FIG 5 Time course of ERT in the presence and absence of IP6. ERT reactions containing and lacking 10  $\mu$ M IP6 were incubated for the indicated time periods and subsequently analyzed for various HIV-1 DNA products by qPCR. (A) reactions containing IP6; (B) reactions lacking IP6. Values represent averages of duplicate ERT reactions. (C) Quantification of products with sequences spanning the viral genome in reactions containing and lacking IP6. The blue and green symbols represent values from independent ERT reactions. Dashed lines connect values from ERT reactions lacking IP6. Results shown in this figure are from one of two independent experiments.

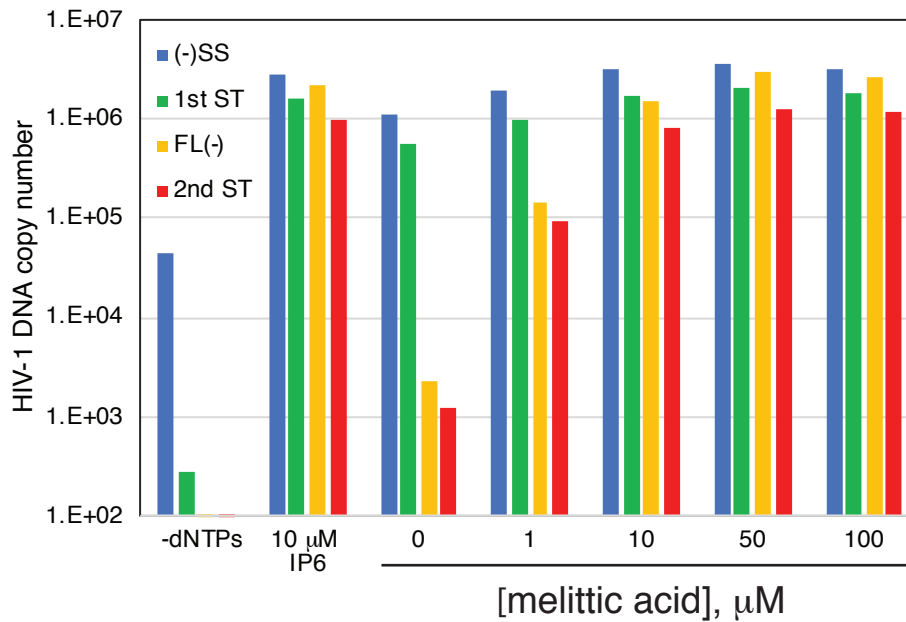

FIG 6 The capsid-stabilizing compound HCB also stimulates ERT. Reactions were containing the indicated concentrations of HCB were incubated for 16h at 37°C, and the products were analyzed by qPCR. Results shown are representative of two independent experiments.

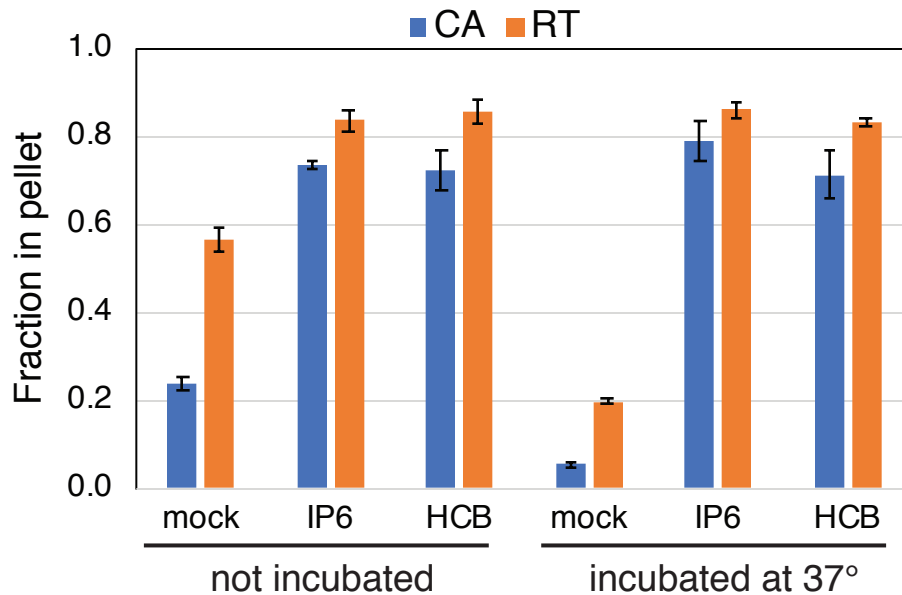

FIG 7 IP6 and HCB stabilize viral cores during reverse transcription. ERT reactions containing no additive, 10  $\mu$ M IP6, or 100  $\mu$ M HCB not incubated or incubated at 37°C for 6h. Reactions were diluted tenfold with reaction buffer, and the cores were pelleted by ultracentrifugation and the pellets and supernatants analyzed for CA and RT activity. Shown is the fraction of the total CA and RT activity in the pellets. The values shown are the average values of duplicate reactions from one of two independent experiments, which produced similar outcomes.

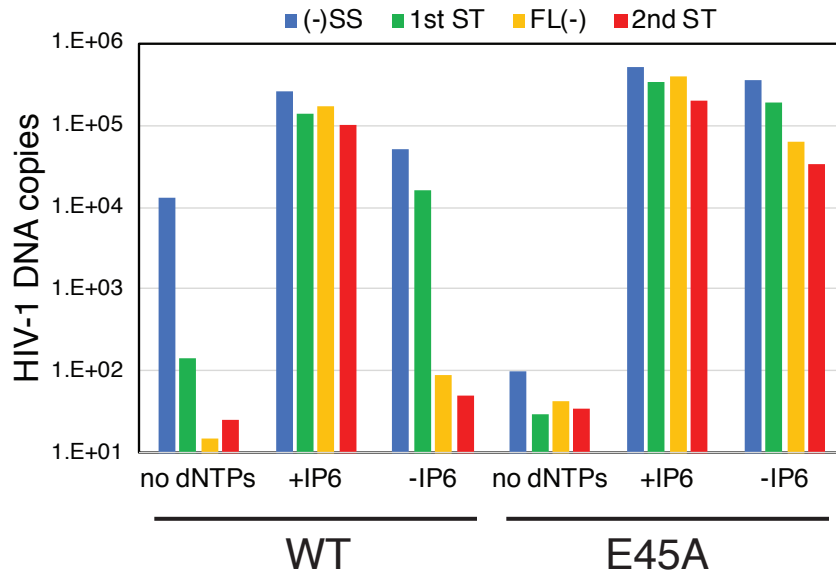

FIG 8 Cores from the E45A HIV-1 mutant, which contains a hyper-stable capsid, are less dependent on IP6 for ERT. WT and E45A mutant HIV-1 cores were assayed for ERT in reactions with and without added IP6 or HCB.

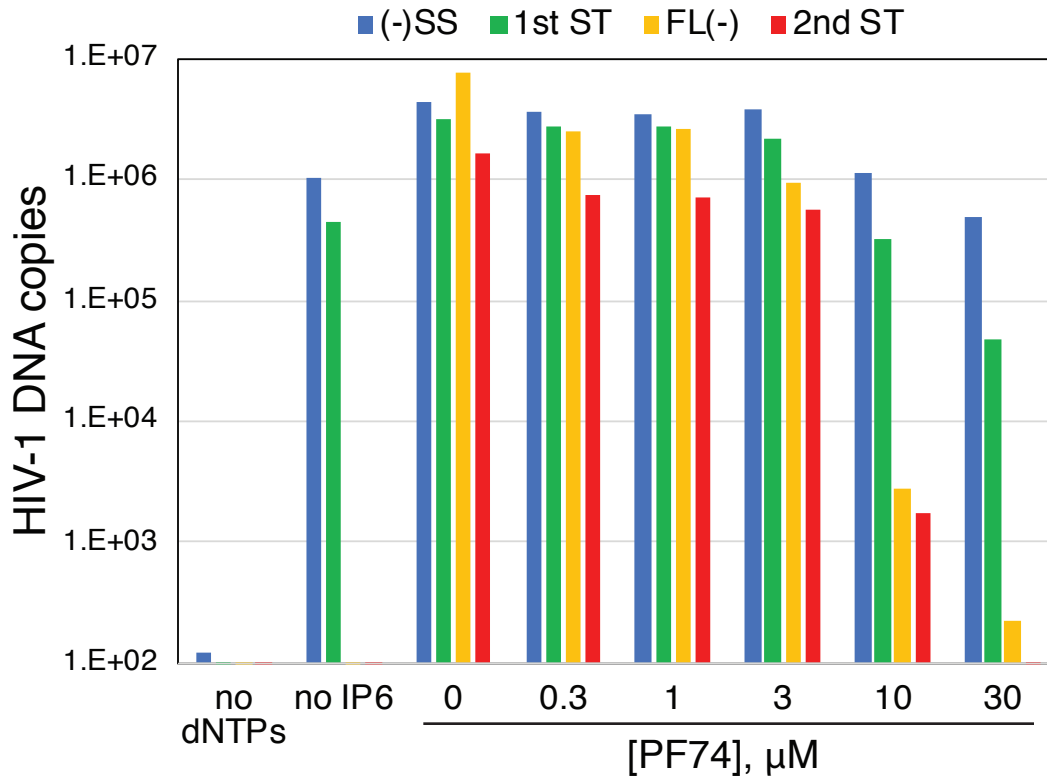

FIG 9 The capsid-targeting antiviral compound PF74 inhibits ERT. Optimized ERT reactions containing the indicated concentrations of PF74 were incubated for 16h. DNA products were purified and analyzed for HIV-1 sequences by qPCR. These results are representative of 2 independent experiments.
